# Supplementary material for: Interaction of RNA polymerase II and the small RNA machinery affects heterochromatic silencing in Drosophila
Source: Springer Nature journal article supplement (doi:10.1186/1756-8935-2-15), 2009-11-16
Supplement: Additional file 1 [file 1756-8935-2-15-s1.pdf]

*SM6a/+;RNA Pol II140(A5)/+*

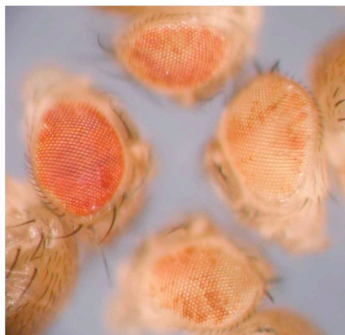

*aub[QC42];MKRS/TM3,Ser*

*MKRS/TM3,Ser*  
control

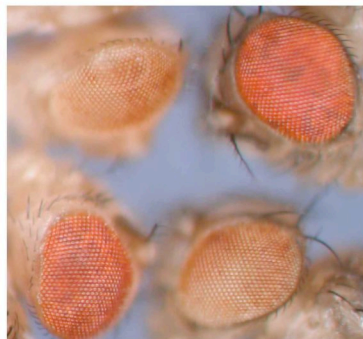

*RNA Pol II140(A5)/MKRS*

*hls[E616]/+;*  
*RNA Pol II140(A5)/+*

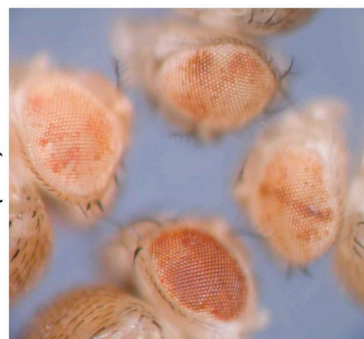

*hls (DE8)/+;RNA Pol II140(A5)/+*

*RNA Pol II140(A5)/TM3,Ser*

*SM6a/+;MKRS/TM3,Ser*  
control

*MKRS/TM3,Ser*  
control

*aub[QC42]/+;*  
*RNA Pol II140(A5)/+*

*hls[125]/+;*  
*RNA Pol II140 (wimp)/+*

*MKRS/TM3,Ser*  
control

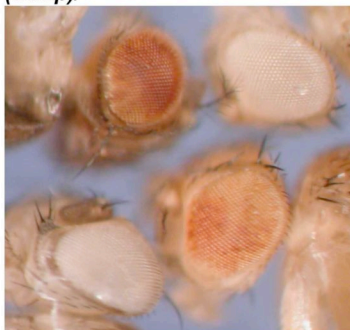

*hls[125]/TM3,Ser*

*RNA Pol II140 (wimp)/+*

*ago-2[414]/MKRS*

*MKRS/TM3,Ser*  
CONTROL

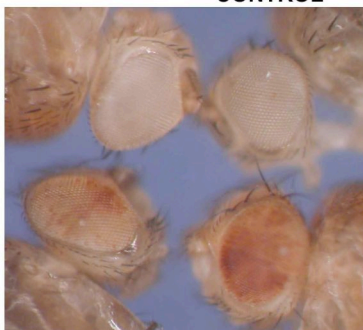

*RNA Pol II140 (wimp)/Ser*

*ago-2[414]/+;*  
*RNA Pol II140(wimp)/+*

*dcr-2(L811fsX)/+;*  
*MKRS/TM3,Ser*

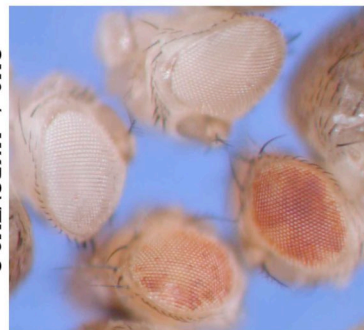

*SM6a/+;RNA Pol II140(A5)/+*

*SM6a/+;MKRS/TM3,Ser*

*dcr-2(L811fsX)/+;*  
*RNA Pol II140(A5)/+*
