# Supplementary material for: Interaction of RNA polymerase II and the small RNA machinery affects heterochromatic silencing in Drosophila
Source: Springer Nature journal article supplement (doi:10.1186/1756-8935-2-15), 2009-11-16
Supplement: Additional file 12 [file 1756-8935-2-15-s12.pdf]

***Adh-w/w; w-Adh/w-Adh;hls[125]/+,  
RNA Pol II(A5) 140/+***

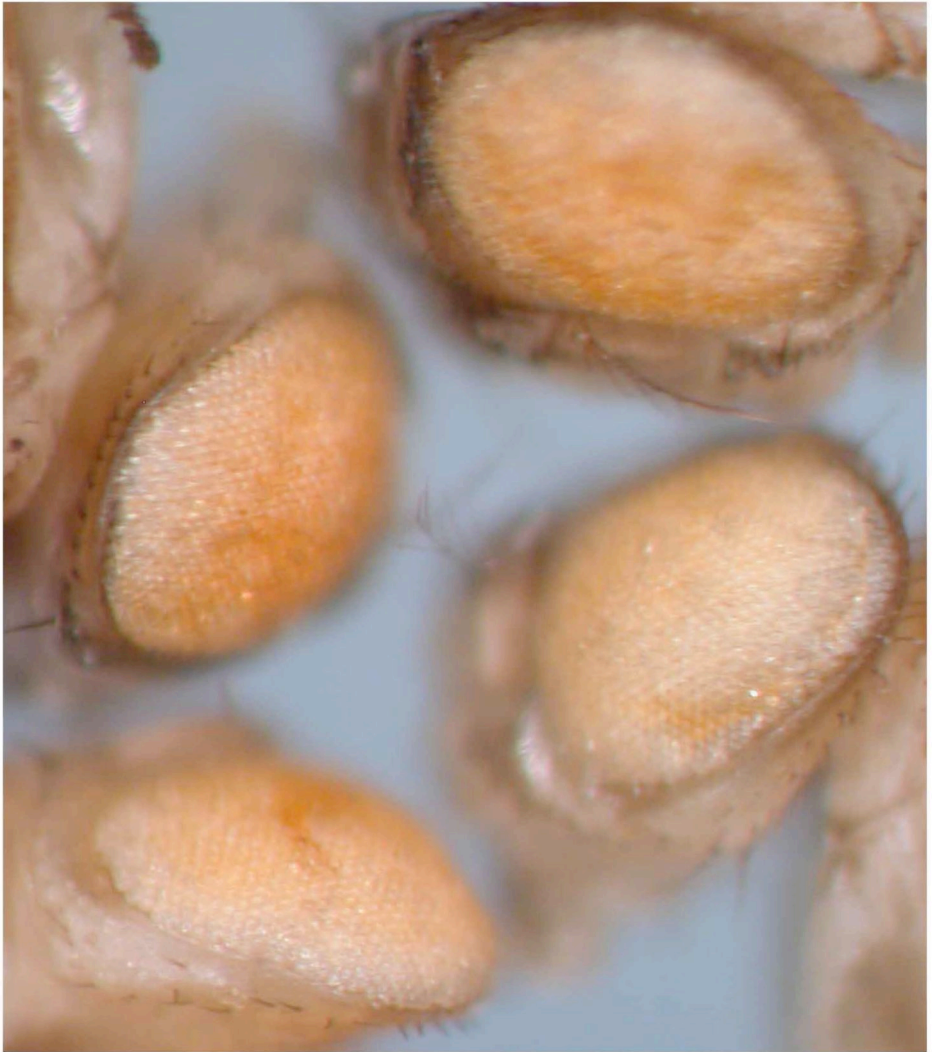

***Adh-w/w;  
w-Adh/  
w-Adh;  
hls[125]/  
MKRS***

***Adh-w/w;  
w-Adh/w-Adh  
MKRS/TM3,Ser***

***Adh-w/w;  
w-Adh/w-Adh  
RNA Pol II140(A5)/TM3,Ser***
